# Supplementary material for: ProteInfer, deep neural networks for protein functional inference
Source: eLife journal article supplement (doi:10.7554/elife.80942), 2023-02-27
Supplement: supp [file elife-80942-supp-v1.zip]

Archive with 12 entries (12 files):
- elife_poa_e80942_Figure_3_figure_supplement_1.png
- elife_poa_e80942_Figure_3_figure_supplement_2.png
- elife_poa_e80942_Figure_3_figure_supplement_3.png
- elife_poa_e80942_Figure_3_figure_supplement_4.png
- elife_poa_e80942_Figure_3_figure_supplement_5.png
- elife_poa_e80942_Figure_3_figure_supplement_6.png
- elife_poa_e80942_Figure_3_figure_supplement_7.pdf
- elife_poa_e80942_Figure_3_figure_supplement_8.pdf
- elife_poa_e80942_Figure_3_figure_supplement_9.pdf
- elife_poa_e80942_Figure_3_figure_supplement_10.pdf
- elife_poa_e80942_Figure_3_figure_supplement_11.png
- elife_poa_e80942_Figure_3_figure_supplement_12.png
