# Supplementary material for: ProteInfer, deep neural networks for protein functional inference
Source: eLife journal article supplement (doi:10.7554/elife.80942), 2023-02-27
Supplement: supp [file elife-80942-supp-v1.zip › elife_poa_e80942_Figure_3_figure_supplement_7.pdf]

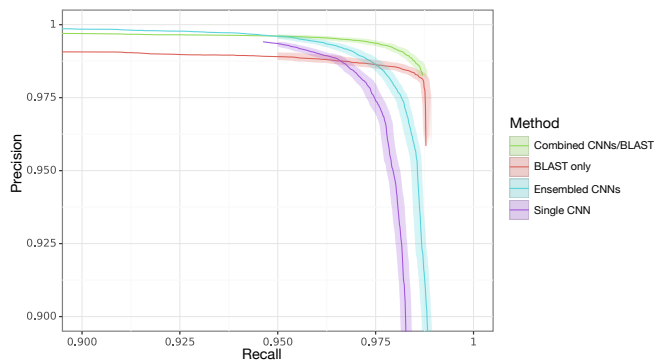

(a) EC number prediction: random split

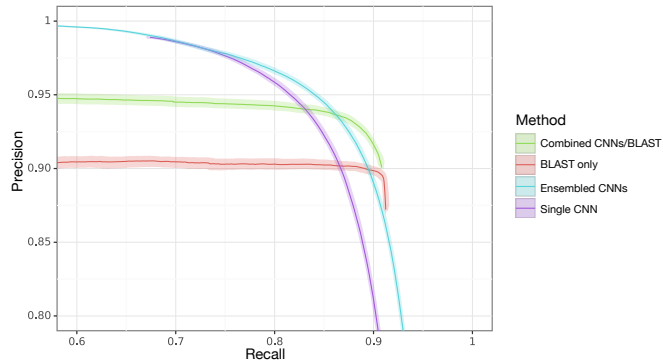

(b) GO term prediction: random split

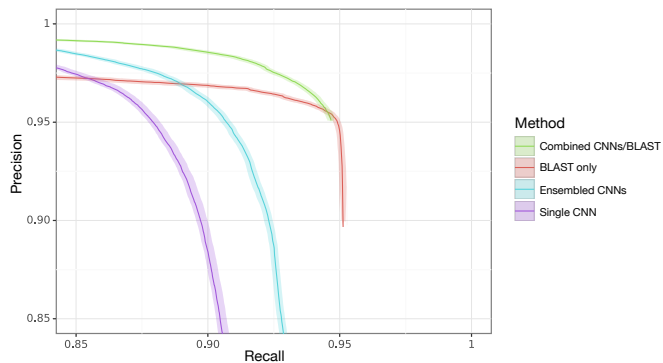

(c) EC number prediction: clustered split

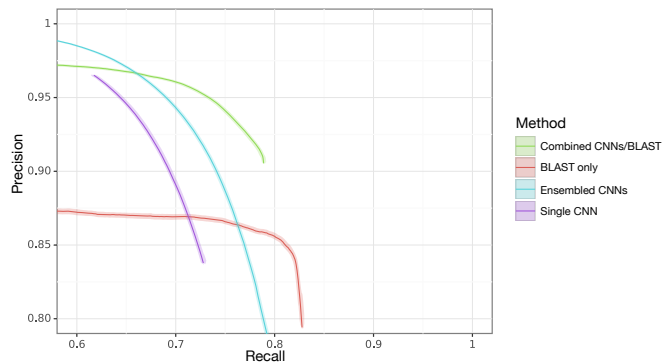

(d) GO term prediction: clustered split
