# Supplementary figures and images for: ProteInfer, deep neural networks for protein functional inference
Source: eLife journal article supplement (doi:10.7554/elife.80942), 2023-02-27

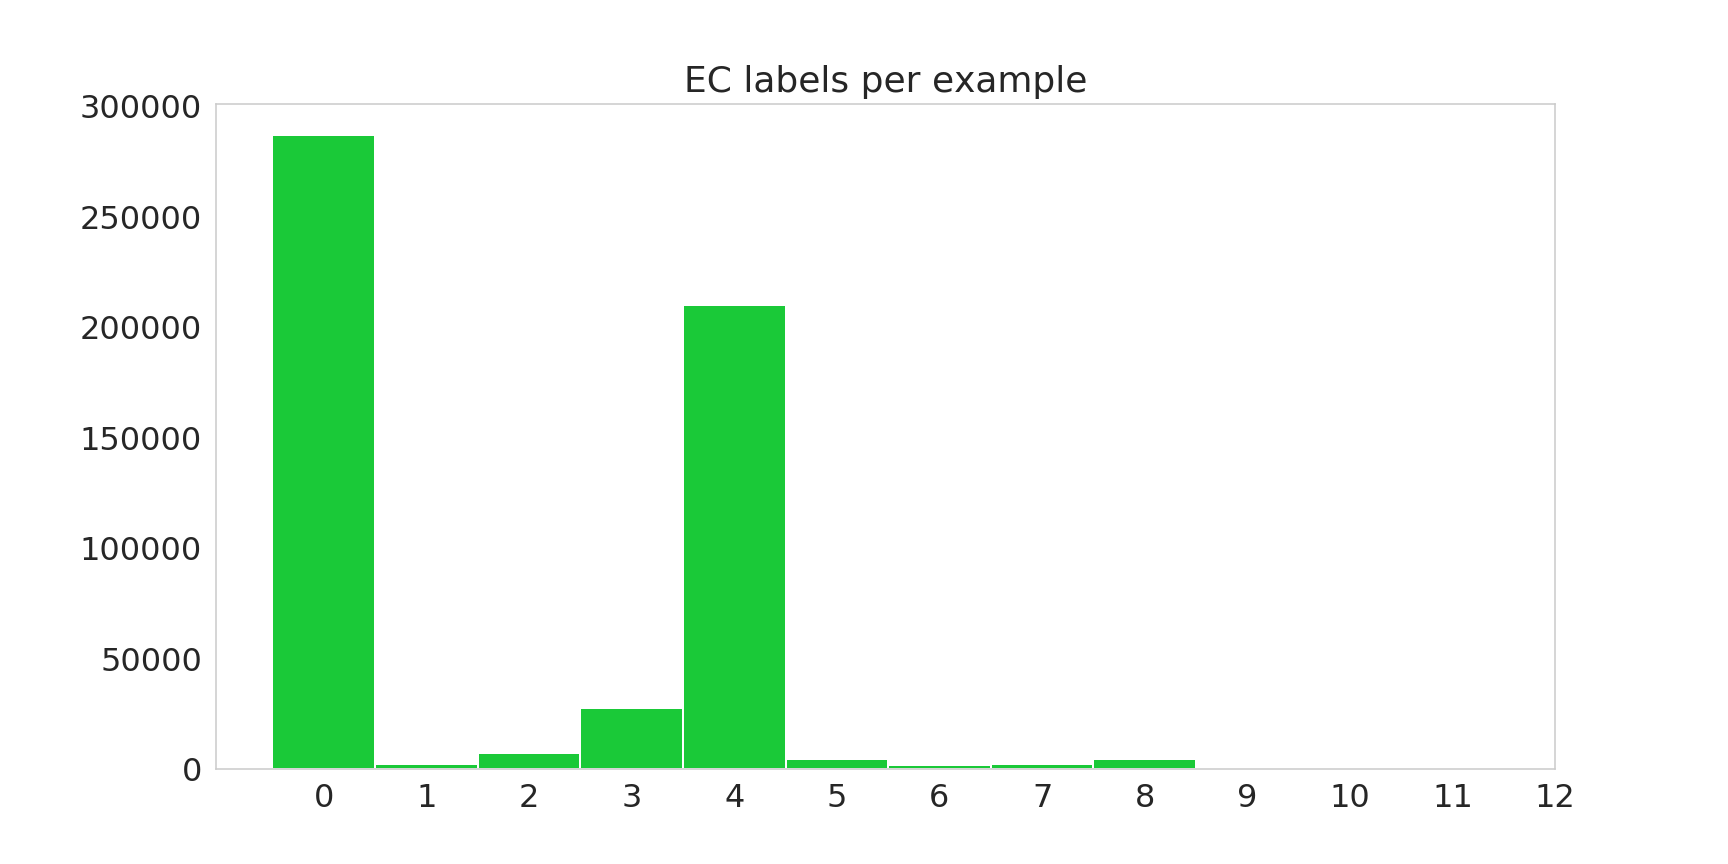

Supplement: supp [file elife-80942-supp-v1.zip › elife_poa_e80942_Figure_3_figure_supplement_1.png]

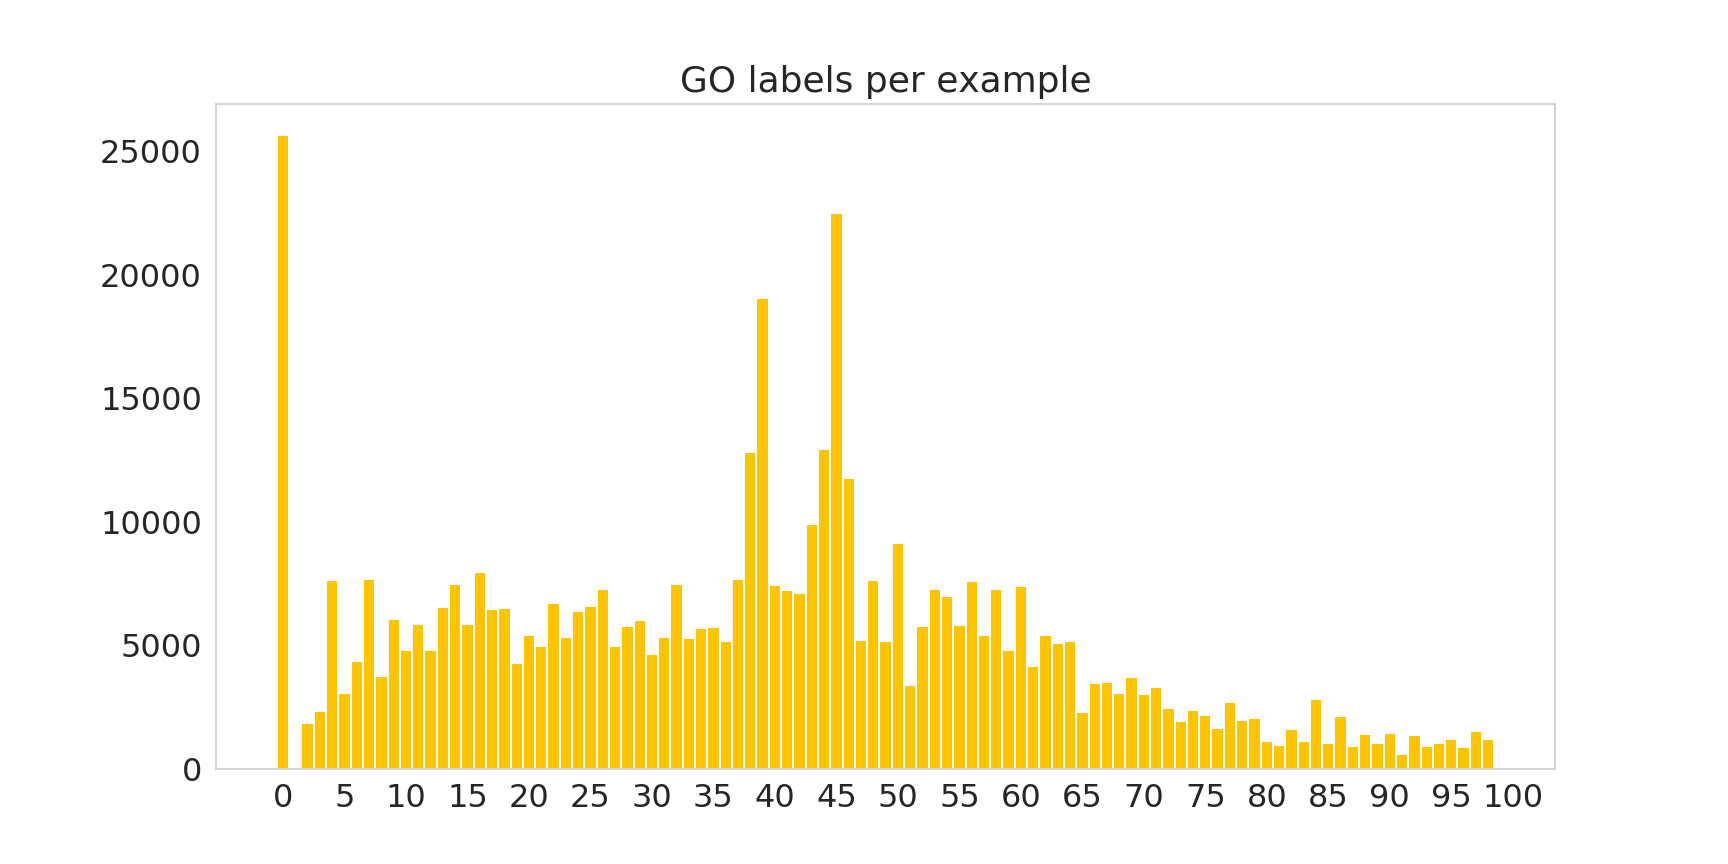

Supplement: supp [file elife-80942-supp-v1.zip › elife_poa_e80942_Figure_3_figure_supplement_2.png]

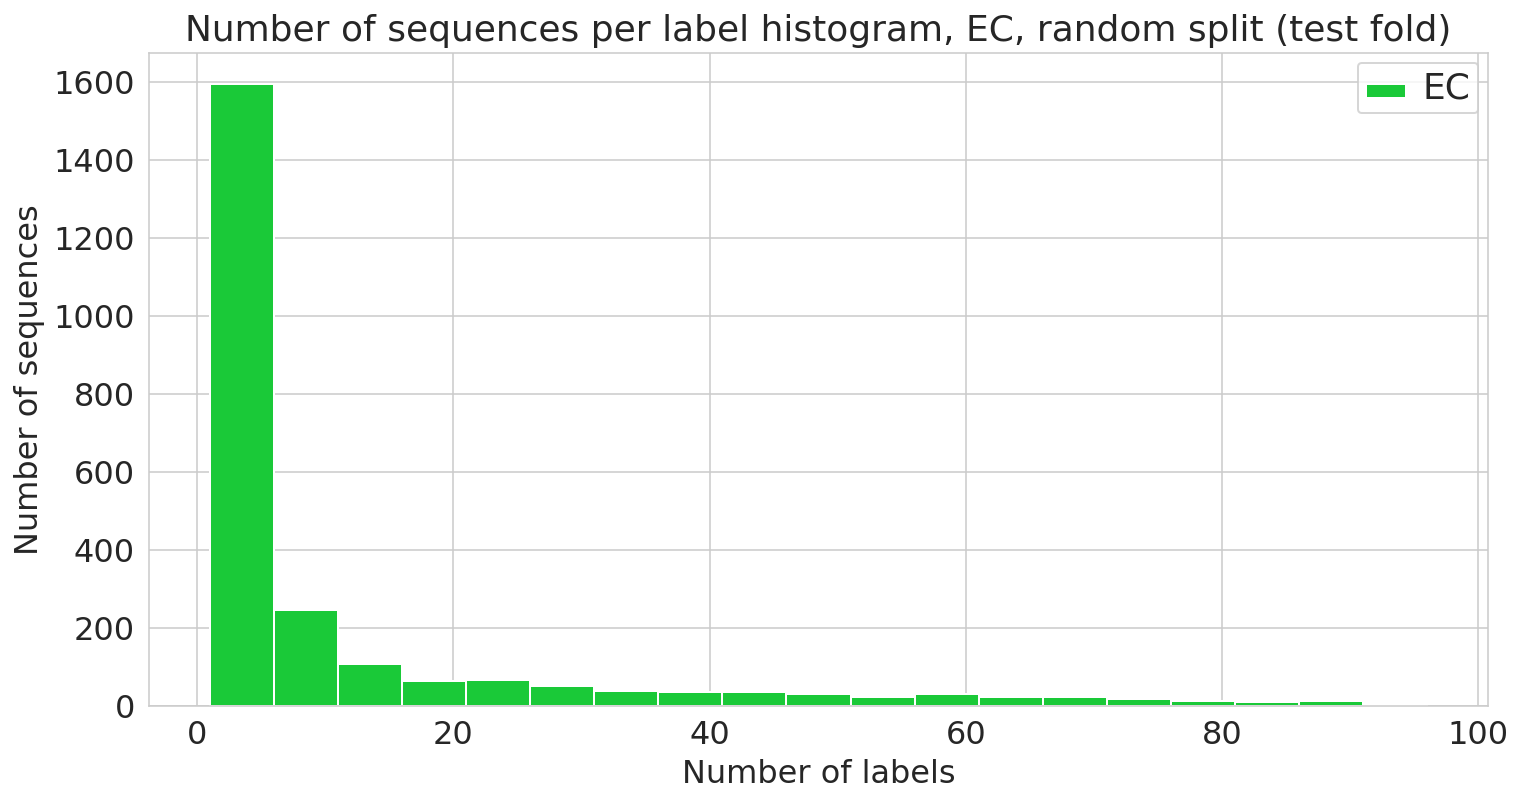

Supplement: supp [file elife-80942-supp-v1.zip › elife_poa_e80942_Figure_3_figure_supplement_3.png]

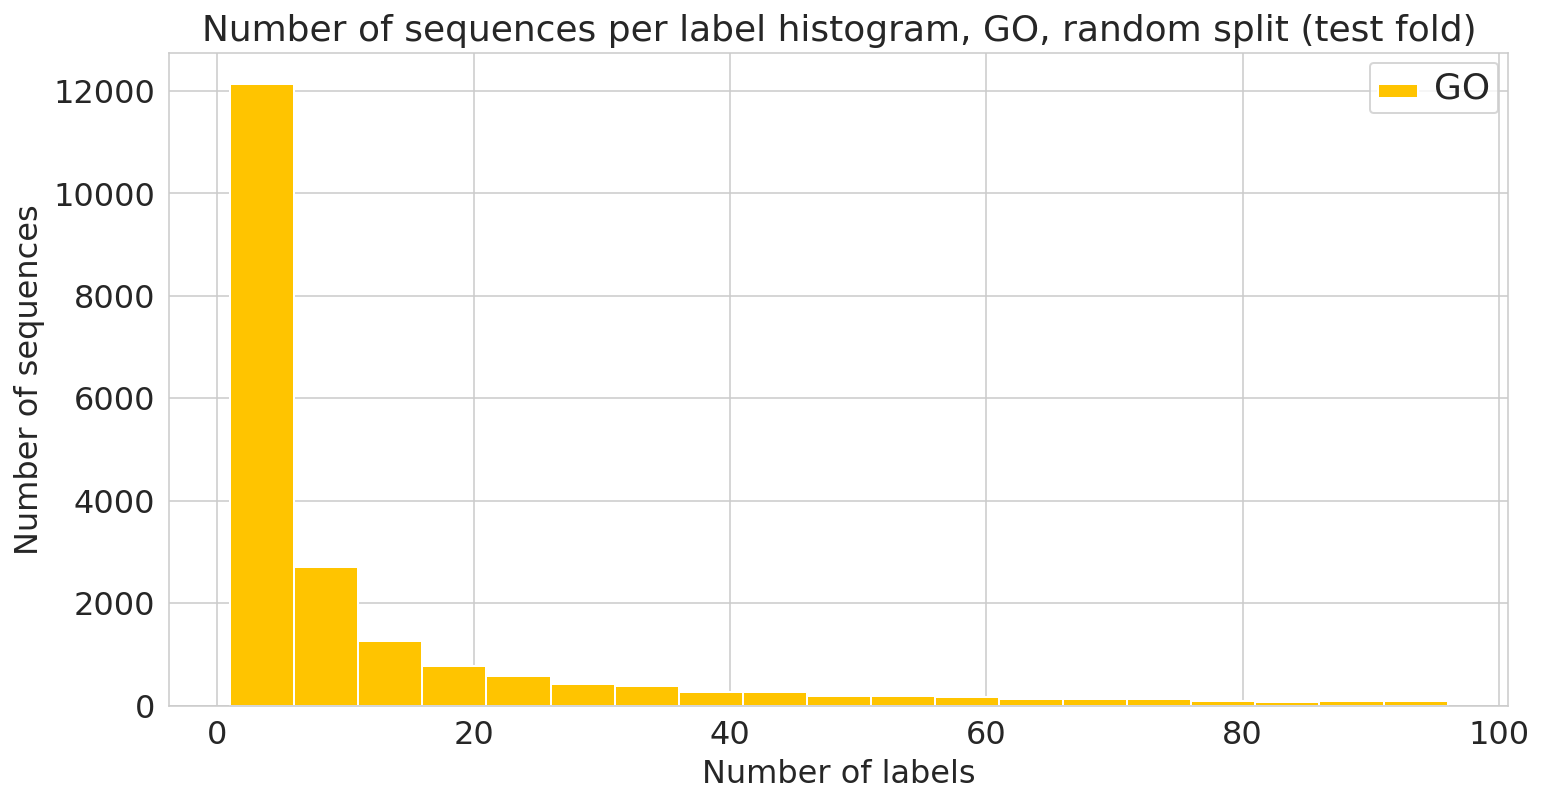

Supplement: supp [file elife-80942-supp-v1.zip › elife_poa_e80942_Figure_3_figure_supplement_4.png]

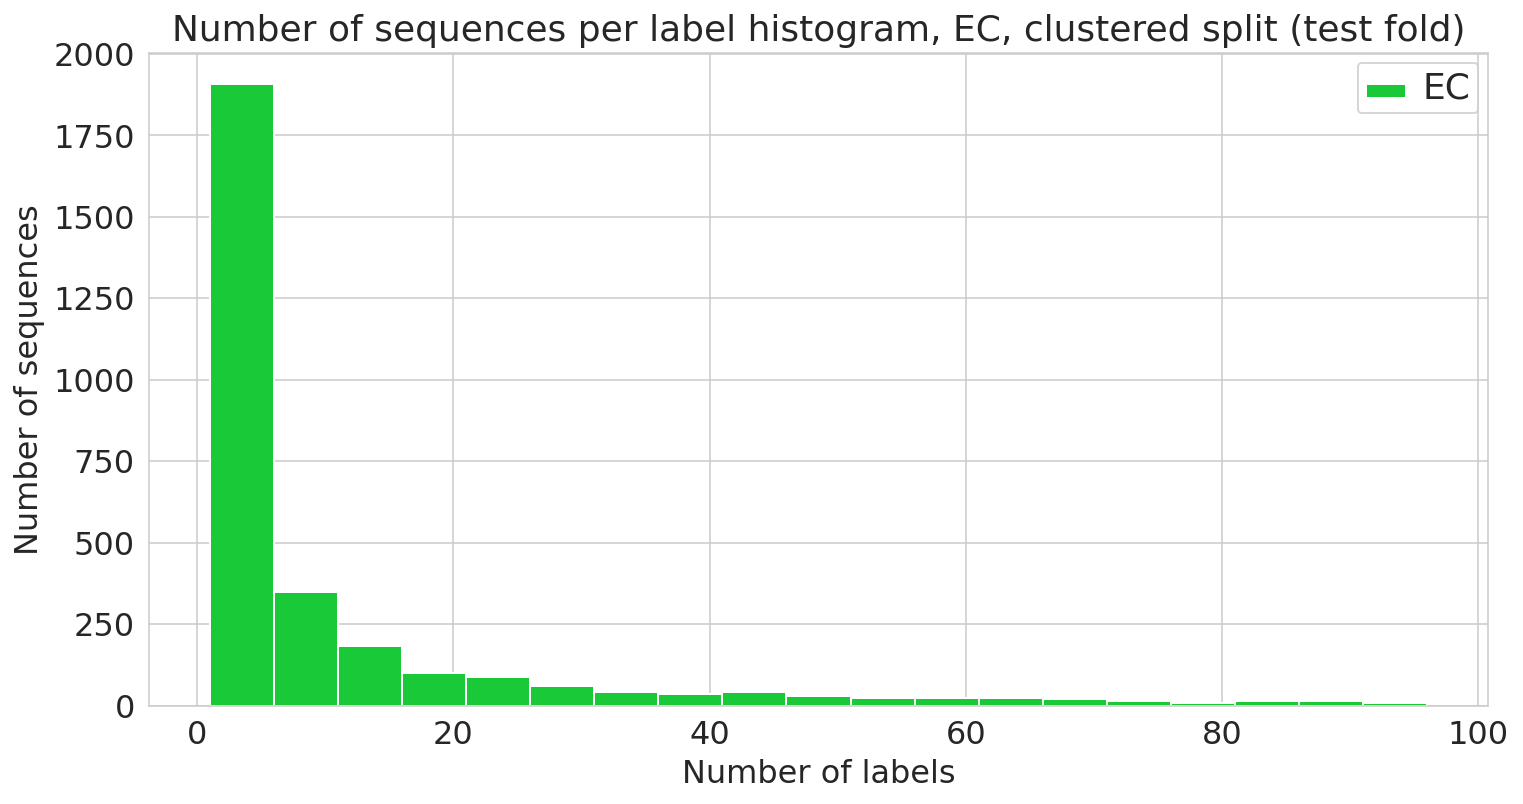

Supplement: supp [file elife-80942-supp-v1.zip › elife_poa_e80942_Figure_3_figure_supplement_5.png]

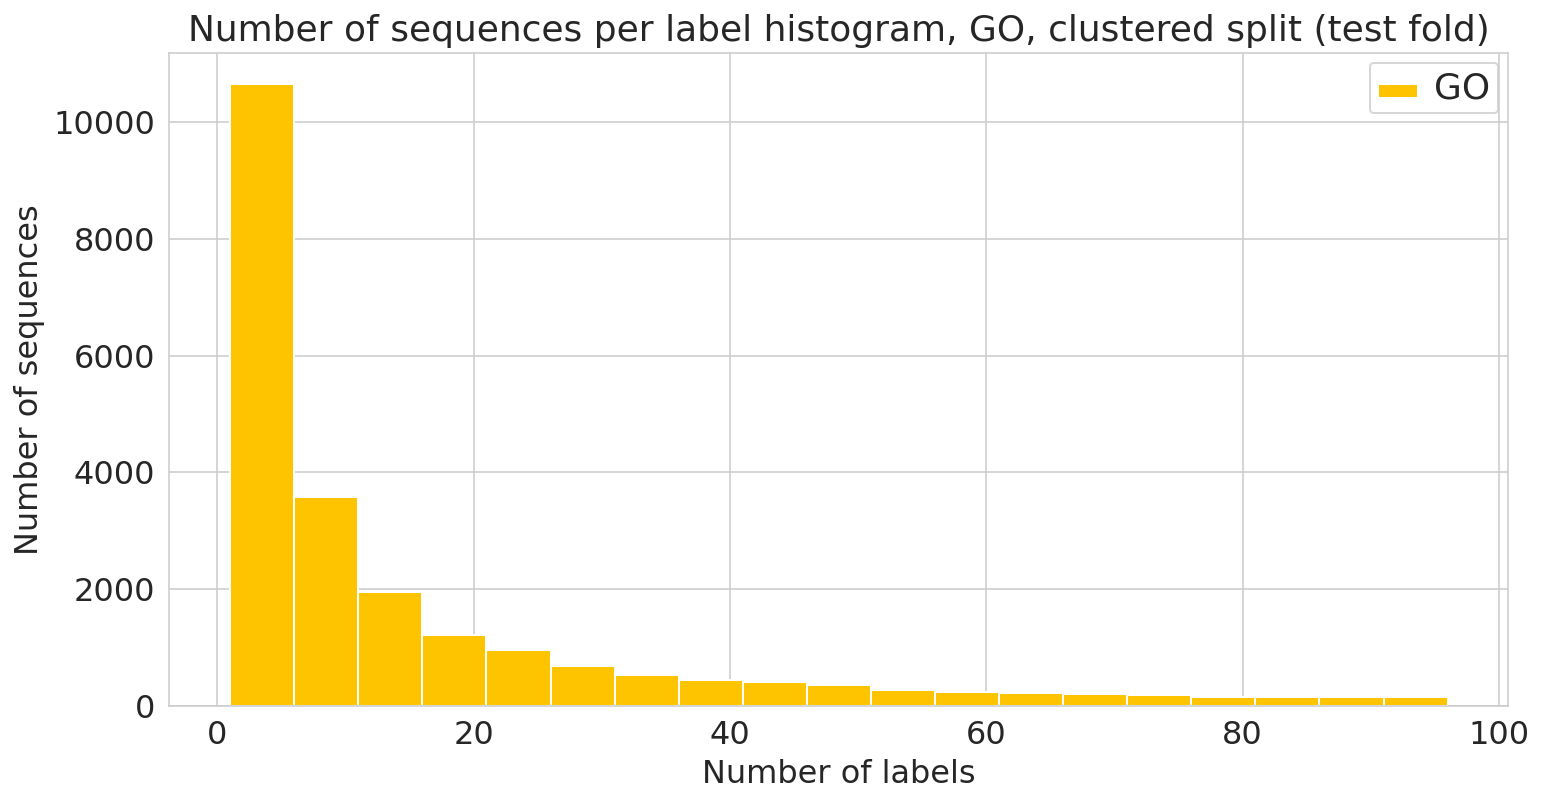

Supplement: supp [file elife-80942-supp-v1.zip › elife_poa_e80942_Figure_3_figure_supplement_6.png]

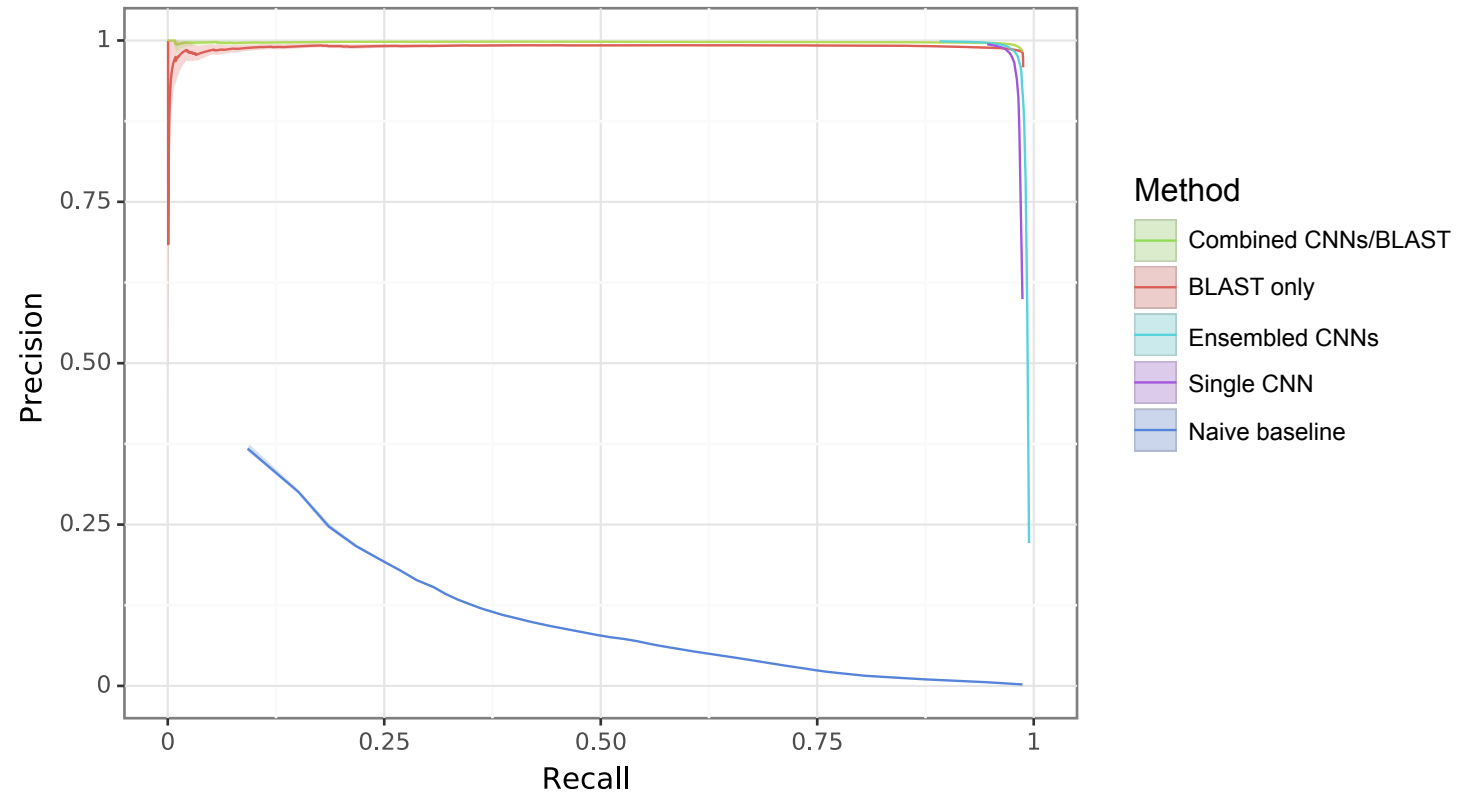

Supplement: supp [file elife-80942-supp-v1.zip › elife_poa_e80942_Figure_3_figure_supplement_9.pdf]

Biological process

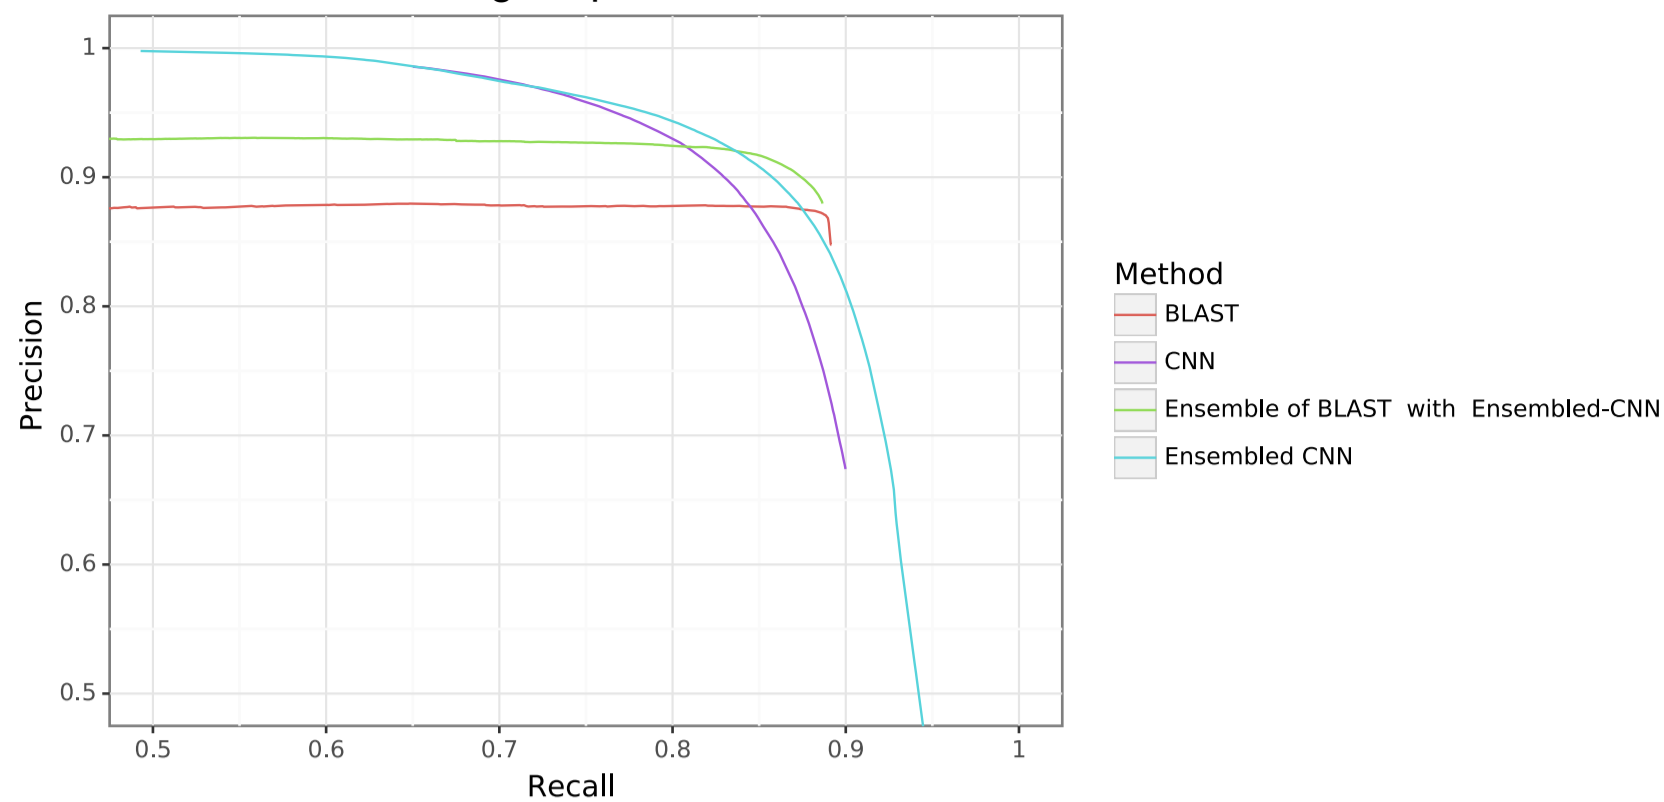

Cellular component

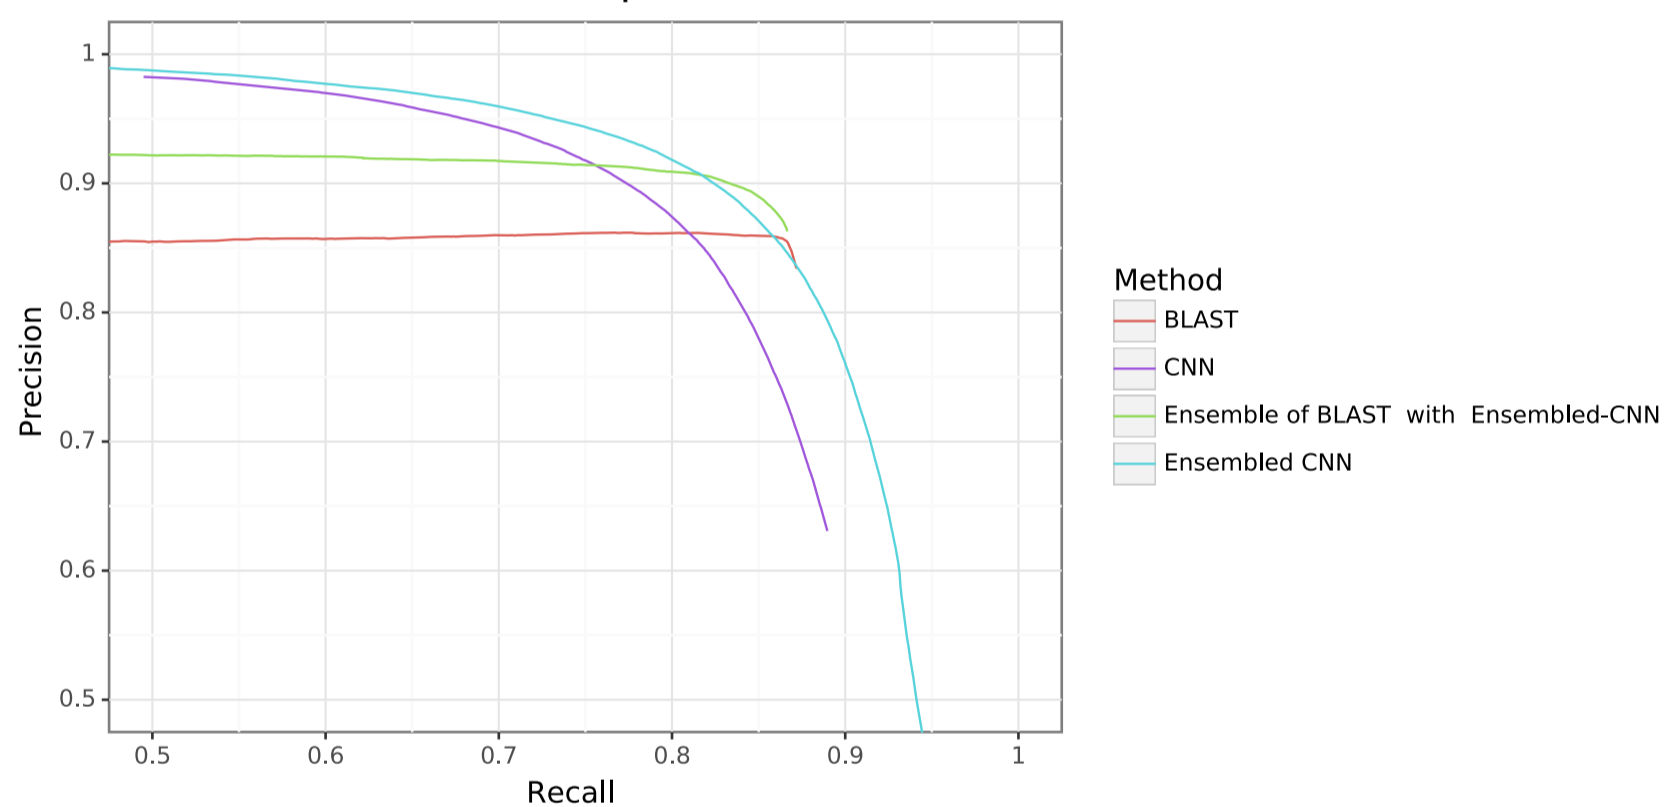

Molecular function

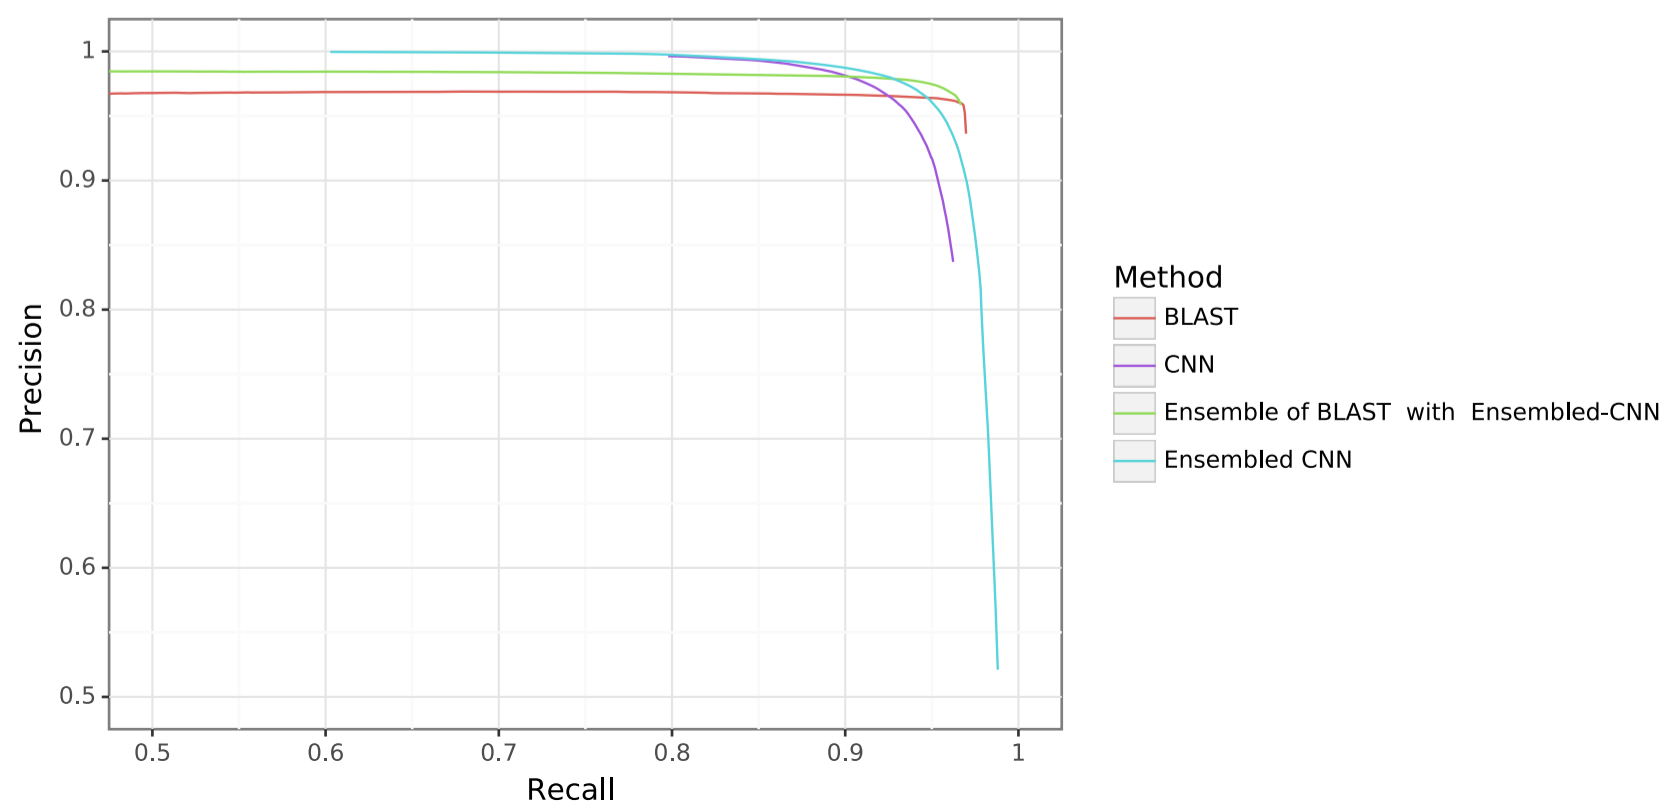

Supplement: supp [file elife-80942-supp-v1.zip › elife_poa_e80942_Figure_3_figure_supplement_10.pdf]

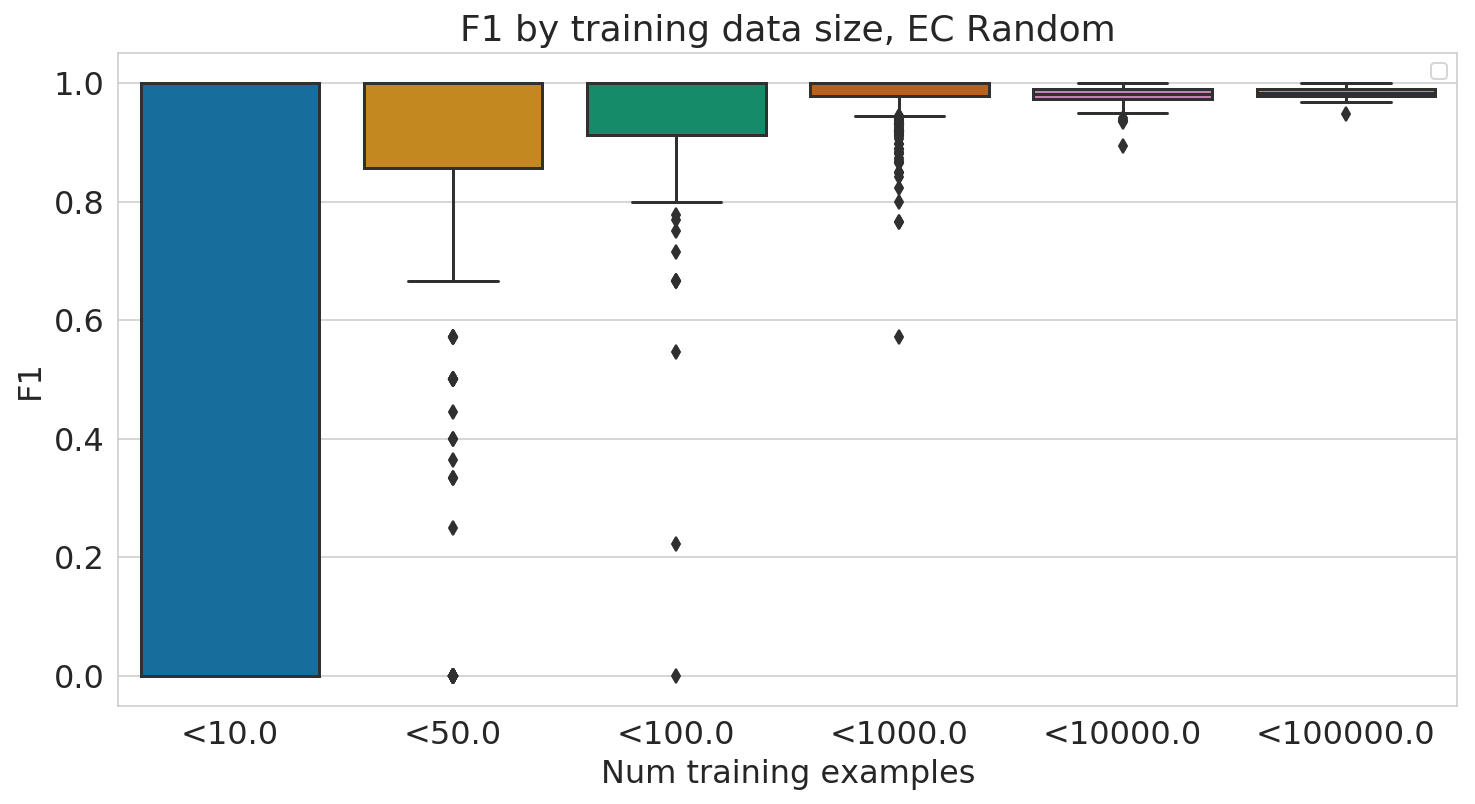

Supplement: supp [file elife-80942-supp-v1.zip › elife_poa_e80942_Figure_3_figure_supplement_11.png]

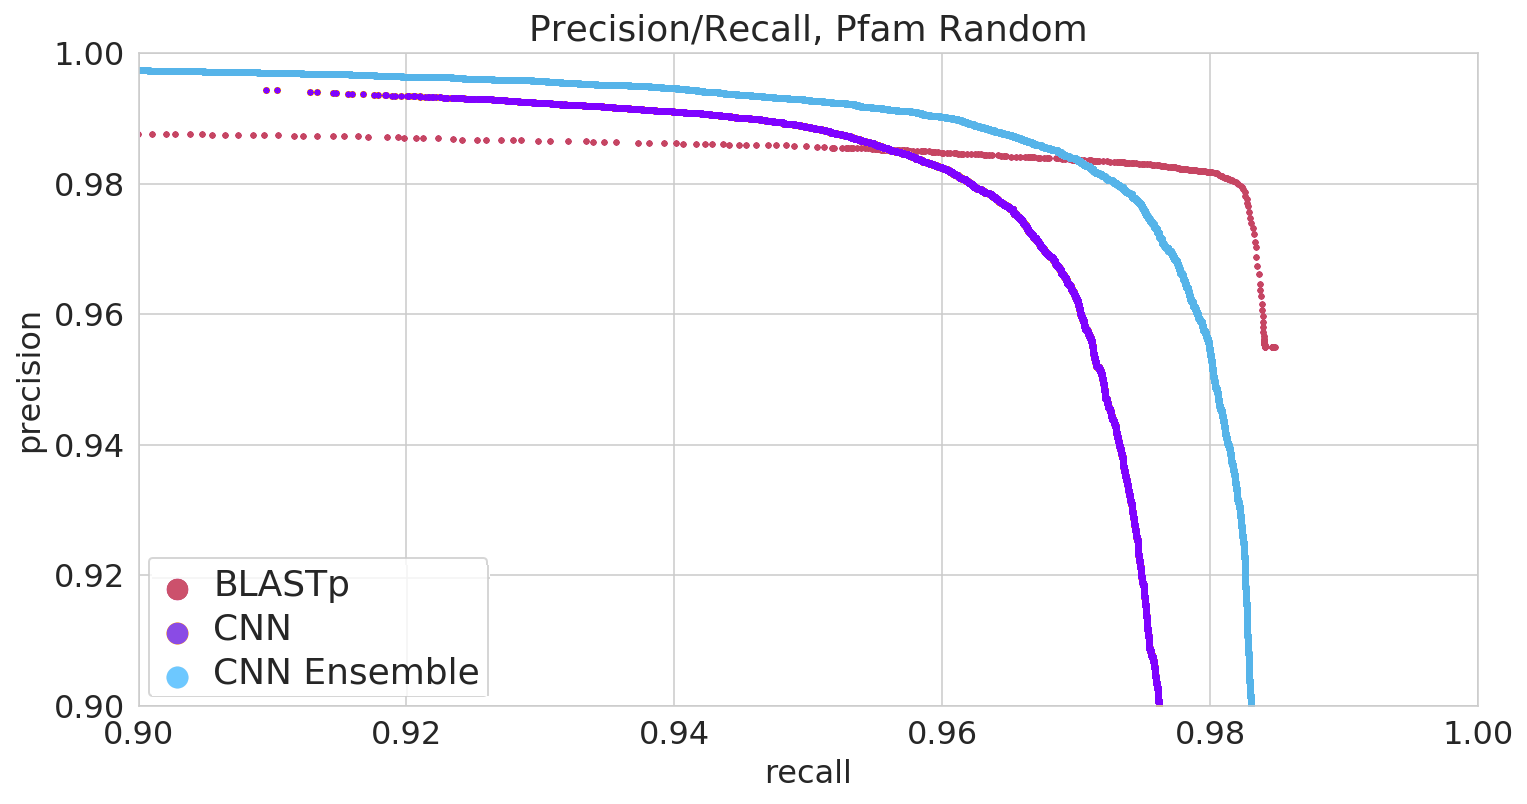

Supplement: supp [file elife-80942-supp-v1.zip › elife_poa_e80942_Figure_3_figure_supplement_12.png]
